CORRECTION

# Correction: Two Independent Mutations in *ADAMTS17* Are Associated with Primary Open Angle Glaucoma in the Basset Hound and Basset Fauve de Bretagne Breeds of Dog

James A. C. Oliver, Oliver P. Forman, Louise Pettitt, Cathryn S. Mellersh

[Fig 3](#) is incorrect. The authors have provided a corrected version here.

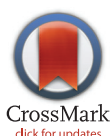

## OPEN ACCESS

**Citation:** Oliver JAC, Forman OP, Pettitt L, Mellersh CS (2016) Correction: Two Independent Mutations in *ADAMTS17* Are Associated with Primary Open Angle Glaucoma in the Basset Hound and Basset Fauve de Bretagne Breeds of Dog. PLoS ONE 11(5): e0156192. doi:10.1371/journal.pone.0156192

**Published:** May 18, 2016

**Copyright:** © 2016 Oliver et al. This is an open access article distributed under the terms of the [Creative Commons Attribution License](#), which permits unrestricted use, distribution, and reproduction in any medium, provided the original author and source are credited.

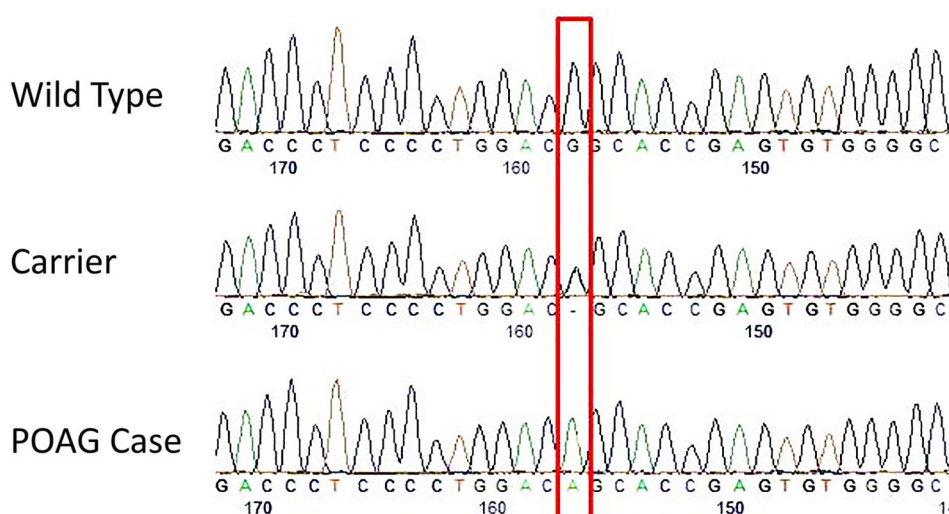

**Fig 3. Electropherograms depicting the site of the missense mutation in the Basset Fauve de Bretagne affected with POAG.** The red box depicts the exact site of the mutation (CanFam3.1 chr3:40,808,345). At this location, the wild type is GG, the carrier is AG and the POAG case is AA.

doi:10.1371/journal.pone.0156192.g001

## Reference

1. Oliver JAC, Forman OP, Pettitt L, Mellersh CS (2015) Two Independent Mutations in *ADAMTS17* Are Associated with Primary Open Angle Glaucoma in the Basset Hound and Basset Fauve de Bretagne Breeds of Dog. PLoS ONE 10(10): e0140436. doi: [10.1371/journal.pone.0140436](https://doi.org/10.1371/journal.pone.0140436) PMID: [26474315](https://pubmed.ncbi.nlm.nih.gov/26474315/)
